# Supplementary material for: All-solution-processed inorganic CsPbBr3 solar cells and their bifacial-irradiation functions
Source: Royal Society of Chemistry journal article supplement (doi:10.1039/d4se00845f), 2024-01-01
Supplement: d4se00845f1.pdf [file d4se00845f1.pdf]

## Supporting Information

# All-solution-processed inorganic CsPbBr<sub>3</sub> solar cells and their bifacial-irradiation functions

Hiroaki Daiguji, Hiroto Takano, Ibuki Watanabe, Rin Ando, Manabu Ishizaki\* and  
Masato Kurihara\*

---

Faculty of Science, Yamagata University, 1-4-12 Kojirakawa-machi, Yamagata, Yamagata 990-8560, Japan.  
Email: kurihara@sci.kj.yamagata-u.ac.jp; manabu-ishizaki@sci.kj.yamagata-u.ac.jp.

**Table S1** Monofacial-irradiation photovoltaic parameter values of HTL-free CsPbBr<sub>3</sub> solar cells of FTO/TiO<sub>2</sub>/CsPbBr<sub>3</sub>/carbon using carbon pastes as top electrodes fabricated on commercial transparent FTO glass substrates as bottom electrodes

| Refs.     | Preparation method  |                | $J_{sc}$ (mA cm <sup>-2</sup> ) | $V_{oc}$ (V) | FF     | PCE (%) | Irradiation area (cm <sup>2</sup> ) |
|-----------|---------------------|----------------|---------------------------------|--------------|--------|---------|-------------------------------------|
|           | CsPbBr <sub>3</sub> | top electrodes |                                 |              |        |         |                                     |
| 1         | D                   | S              | 6.81                            | 1.43         | 0.7996 | 7.81    | 0.06                                |
| 2         | D                   | S              | 6.49                            | 1.42         | 0.79   | 7.22    | 0.16                                |
| *3        | D                   | S              | 7.16                            | 1.357        | 0.7297 | 7.09    | 0.09                                |
| 4         | D                   | S              | 9.55                            | 1.413        | 0.73   | 9.86    | 0.09                                |
| 5         | D                   | S              | 7.11                            | 1.372        | 0.7299 | 7.12    | -                                   |
| 6         | D                   | S              | 7.24                            | 1.522        | 0.804  | 8.86    | -                                   |
| 7         | S/D                 | S              | 7.32                            | 1.43         | 0.78   | 8.16    | -                                   |
| 8         | S                   | S              | 8.12                            | 1.46         | 0.81   | 9.6     | 0.1                                 |
| 9         | S                   | S              | 8.06                            | 1.528        | 0.83   | 10.22   | 0.09                                |
|           | S                   | S              | 7.84                            | 1.397        | 0.75   | 8.21    | 1                                   |
| 10        | S                   | S              | 7.47                            | 1.36         | 0.68   | 6.91    | 0.09                                |
| 11        | S                   | S              | 5.99                            | 1.33         | 0.657  | 5.25    | -                                   |
| 12        | S                   | S              | 7.03                            | 1.40         | 0.75   | 7.52    | 0.8                                 |
| 13        | S                   | S              | 7.48                            | 1.19         | 0.688  | 6.12    | 0.04                                |
| 14        | S                   | S              | 7.56                            | 1.52         | 0.827  | 9.53    | 0.09                                |
| 15        | S                   | S              | 7.12                            | 1.49         | 0.6884 | 7.29    | 0.09                                |
| 16        | S                   | S              | 8.74                            | 1.23         | 0.754  | 8.11    | 0.04                                |
| 17        | S                   | S              | 4.5                             | 1.23         | 0.69   | 3.8     | 0.071                               |
| 18        | S                   | S              | 7.4                             | 1.24         | 0.73   | 6.7     | 0.12                                |
| This work | S                   | S              | 7.49                            | 1.48         | 0.79   | 8.68    | 0.049                               |
|           | S                   | S              | 7.22                            | 1.45         | 0.77   | 8.13    | 0.156                               |

D; dry process. S; solution process. \*The carbon electrode was formed using a carbon paste containing carbon nanotubes and MXene. All top carbon electrodes are opaque. In this study, the top SWNT electrode is semitransparent with a controlled transmittance value of 60%T at 550 nm. The photovoltaic parameter values are based on monofacial irradiation through FTO.

#### References

1. L. Liu, S.-E. Yang, P. Liu and Y. Chen, High-quality and full-coverage CsPbBr<sub>3</sub> thin films via electron beam evaporation with post-annealing treatment for all-inorganic perovskite solar cells, *Solar Energy*, 2022, **232**, 320–327.
2. J. Hua, X. Deng, C. Niu, F. Huang, Y. Peng, W. Li, Z. Ku and Y.-B. Cheng, A pressure-assisted annealing method for high quality CsPbBr<sub>3</sub> film deposited by sequential thermal evaporation, *RSC Adv.*, 2020, **10**, 8905–8909.
3. L. Mi, Y. Zhang, T. Chen, E. Xu and Y. Jiang, Carbon electrode engineering for high efficiency all-inorganic perovskite solar cells, *RSC Adv.*, 2020, **10**, 12298–12303.
4. G. Tong, T. Chen, H. Li, L. Qiu, Z. Liu, Y. Dang, W. Song, L. K. Ono, Y. Jiang and Y. Qi, Phase transition induced recrystallization and low surface potential barrier leading to 10.91%-efficient CsPbBr<sub>3</sub> perovskite solar cells, *Nano Energy*, 2019, **65**, 104015.
5. G. Tong, T. Chen, H. Li, W. Song, Y. Chang, J. Liu, L. Yu, J. Xu, Y. Qi and Y. Jiang, High efficient hole extraction and stable all-bromide inorganic perovskite solar cells via derivative-phase gradient bandgap architecture, *Sol. RRL*, 2019, **3**, 1900030.
6. Y. Zhang, L. Luo, J. Hua, C. Wang, F. Huang, J. Zhong, Y. Peng, Z. Ku and Y.-B. Cheng, Moisture assisted CsPbBr<sub>3</sub> film growth for high-efficiency, all-inorganic solar cells prepared by a multiple sequential vacuum deposition method, *Mater. Sci. Semicond. Process.*, 2019, **98**, 39–43.
7. X. Li, Y. Tan, H. Lai, S. Li, Y. Chen, S. Li, P. Xu and J. Yang, All-inorganic CsPbBr<sub>3</sub> perovskite solar cells with 10.45% efficiency by evaporation-assisted deposition and setting intermediate energy levels, *ACS Appl. Mater. Interfaces*, 2019, **11**, 29746–29752.

8. J. Yan, S. Hou, X. Li, J. Dong, L. Zou, M. Yang, J. Xing, H. Liu and H. Hao, Preparation of highly efficient and stable CsPbBr<sub>3</sub> perovskite solar cells based on an anti-solvent rinsing strategy, *Sol. Energy Mater. Sol. Cells*, 2022, **234**, 111420.
9. Z. Zhang, Y. Ba, D. Chen, J. Ma, W. Zhu, H. Xi, D. Chen, J. Zhang, C. Zhang and Y. Hao, Generic water-based spray-assisted growth for scalable high-efficiency carbon-electrode all-inorganic perovskite solar cells, *iScience*, 2021, **24**, 103365.
10. X. Han, X. Wang, J. Feng, H. Huang, Z. Zhu, T. Yu, Z. Li and Z. Zou, Carrier Mobility Enhancement in (121)-Oriented CsPbBr<sub>3</sub> Perovskite Films Induced by the Microstructure Tailoring of PbBr<sub>2</sub> Precursor Films, *ACS Appl. Electron. Mater.*, 2021, **3**, 373–384.
11. Li, Z. Zhu, X. Han, T. Yu, Y. Xu, J. Feng, Z. Li and Z. Zou, Direct Molecule Substitution Enabled Rapid Transformation of Wet PbBr<sub>2</sub>(DMF) Precursor Films to CsPbBr<sub>3</sub> Perovskite, *ACS Appl. Energy Mater.*, 2021, **4**, 6414–6421.
12. S. Wang, W. Shen, Y. Chu, W. Zhang, L. Hong, A. Mei, Y. Rong, Y. Tang, Y. Hu and H. Han, Mesoporous-carbon-based fully-printable all-inorganic monoclinic CsPbBr<sub>3</sub> perovskite solar cells with ultrastability under high temperature and high humidity, *J. Phys. Chem. Lett.*, 2020, **11**, 9689–9695.
13. X. Cao, G. Zhang, L. Jiang, Y. Cai, Y. Gao, W. Yang, X. He, Q. Zeng, G. Xing, Y. Jia and J. Wei, Water, a green solvent for fabrication of high-quality CsPbBr<sub>3</sub> films for efficient solar cells, *ACS Appl. Mater. Interfaces*, 2020, **12**, 5925–5931.
14. Y. Wu, Y. Wang, J. Duan, X. Yang, J. Zhang, L. Liu and Q. Tang, Cluster effect of additives in precursors for inorganic perovskites solar cells, *Electrochim. Acta*, 2020, **331**, 135379.
15. Q. Meng, J. Feng, H. Huang, X. Han, Z. Zhu, T. Yu, Z. Li and Z. Zou, Simultaneous optimization of phase and morphology of CsPbBr<sub>3</sub> films via controllable Ostwald ripening by ethylene glycol monomethylether/isopropanol bi-solvent engineering, *Adv. Eng. Mater.*, 2020, **22**, 2000162.
16. X. Cao, G. Zhang, Y. Cai, L. Jiang, X. He, Q. Zeng, J. Wei, Y. Jia, G. Xing and W. Huang, All green solvents for fabrication of CsPbBr<sub>3</sub> films for efficient solar cells guided by the Hansen solubility theory, *Sol. RRL*, 2020, **4**, 2000008.
17. Z. Liu, B. Sun, X. Liu, J. Han, H. Ye, T. Shi, Z. Tang and G. Liao, Efficient carbon-based CsPbBr<sub>3</sub> inorganic perovskite solar cells by using Cu-phthalocyanine as hole transport material, *Nano-Micro Lett*, 2018, **10**, 34.
18. J. Liang, C. Wang, Y. Wang, Z. Xu, Z. Lu, Y. Ma, H. Zhu, Y. Hu, C. Xiao, X. Yi, G. Zhu, H. Lv, L. Ma, T. Chen, Z. Tie, Z. Jin and J. Liu, All-inorganic perovskite solar cells, *J. Am. Chem. Soc.*, 2016, **138**, 15829–15832.

**Table S2** Monofacial-irradiation photovoltaic parameter values of see-through CsPbBr<sub>3</sub> solar cells fabricated on commercial transparent ITO or FTO glass substrates as bottom electrodes

| Refs.     | Cell configuration                                                             | Preparation method  |                  | $J_{sc}$<br>(mA cm <sup>-2</sup> ) | $V_{oc}$ (V) | FF     | PCE (%) | Irradiation area<br>(cm <sup>2</sup> ) |
|-----------|--------------------------------------------------------------------------------|---------------------|------------------|------------------------------------|--------------|--------|---------|----------------------------------------|
|           |                                                                                | CsPbBr <sub>3</sub> | top<br>electrode |                                    |              |        |         |                                        |
| 1         | FTO/SnO <sub>2</sub> /CsPbBr <sub>3</sub> /NiO <sub>x</sub> /ITO               | D                   | D                | 6.67                               | 1.55         | 0.70   | 7.28    | 0.4175                                 |
| 2         | FTO/ZnO/CsPbBr <sub>3</sub> /spiro-OMeTAD/ITO                                  | S                   | D                | 3.73                               | 0.94         | 0.3495 | 4.94    | 0.25                                   |
| 3         | ITO/SnO <sub>x</sub> /CsPbBr <sub>3</sub> /P3HT/ITO nanoparticles/Ag nanowires | S                   | S                | 6.33                               | 1.32         | 0.677  | 5.64    | 0.04                                   |
| 4         | ITO/ZnO/CsPbBr <sub>3</sub> /spiro-OMeTAD/PEDOT:PSS                            | D                   | S                | 6.15                               | 1.38         | 0.7051 | 5.98    | 0.1                                    |
| This work | FTO/TiO <sub>2</sub> /CsPbBr <sub>3</sub> /SWNT at 60%T                        | S                   | S                | 7.49                               | 1.48         | 0.79   | 8.68    | 0.049                                  |
|           |                                                                                |                     |                  | 7.22                               | 1.45         | 0.77   | 8.13    | 0.156                                  |

D; dry process. S; solution process. The top electrodes are (semi)transparent to prepare see-through CsPbBr<sub>3</sub> solar cells. The see-through solar cells (Refs. 2–4) include organic semiconductors of spiro-OMeTAD and P3HT as an HTL. The photovoltaic parameter values are based on monofacial irradiation through the bottom electrodes of FTO or ITO.

#### References

1. X. Jiang, C. Geng, X. Yu, J. Pan, H. Zheng, C. Liang, B. Li, F. Long, L. Han, Y.-B. Cheng and Y. Peng, Doping with KBr to achieve high-performance CsPbBr<sub>3</sub> semitransparent perovskite solar cells. *ACS Appl. Mater. Interfaces*, 2024, **16**, 19039–19047.
2. T. Das, R. Nag, N. K. Rana, M. Nayak, R. Paramanik, A. Bera, S. K. Saha and A. Guchhait, Effect of transition metal doping in the ZnO nanorod on the efficiency of the electron transport layer in semitransparent CsPbBr<sub>3</sub> perovskite solar cells. *Energy Fuels*, 2023, **37**, 10642–10651.
3. B. Parida, S. Yoon and D.-W. Kang, Room-temperature solution-processed 0D/1D bilayer electrodes for translucent CsPbBr<sub>3</sub> perovskite photovoltaics. *Nanomaterials*, 2021, **11**, 1489.
4. W. Chen, J. Zhang, G. Xu, R. Xue, Y. Li, Y. Zhou, J. Hou and Y. Li, A semitransparent inorganic perovskite film for overcoming ultraviolet light instability of organic solar cells and achieving 14.03% efficiency, *Adv. Mater.*, 2018, **30**, 1800855.

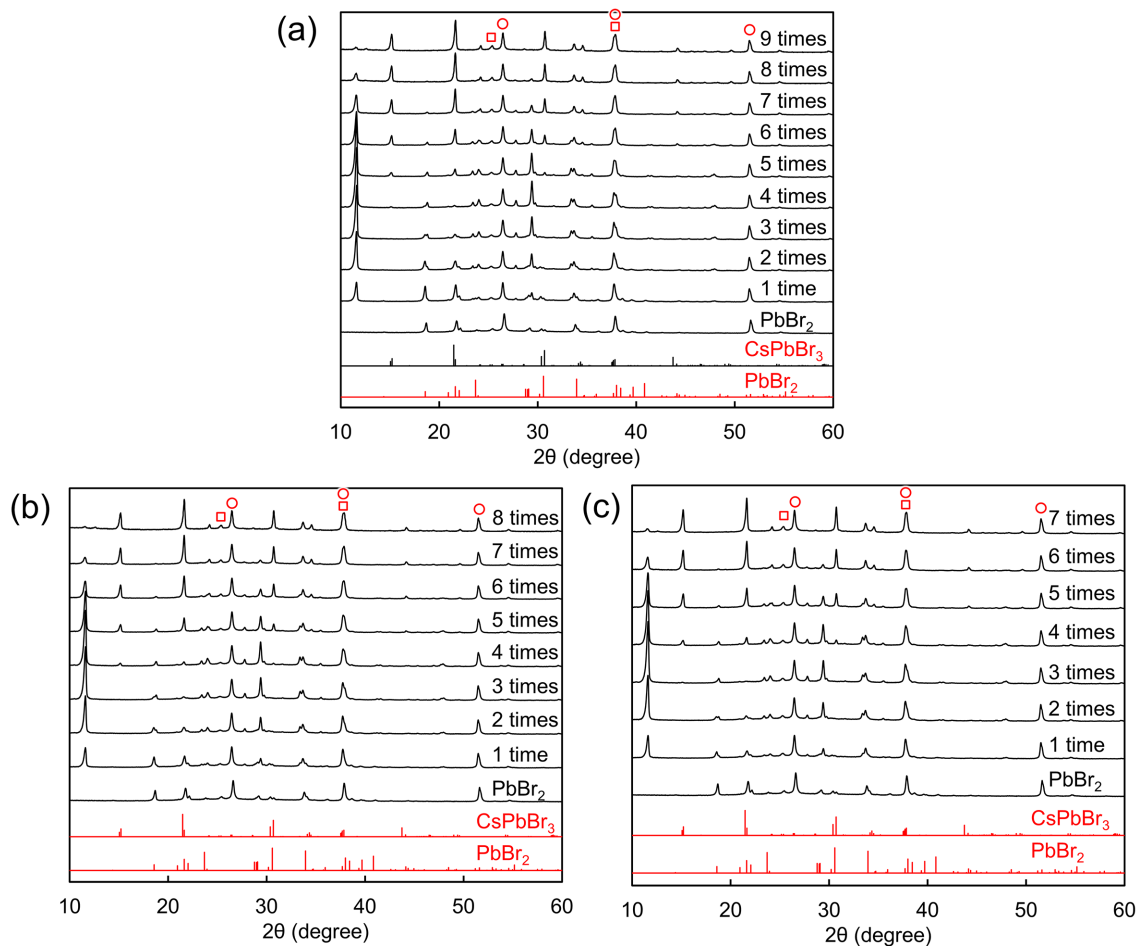

**Fig. S1** Change in XRD patterns via a two-step spin-coating method to prepare CsPbBr<sub>3</sub> layers on mp-TiO<sub>2</sub>/c-TiO<sub>2</sub>/FTO using a PbBr<sub>2</sub> solution of (a) 1.40, (b) 1.30 or (c) 1.20 mol L<sup>-1</sup>. The spin-coating with a CsBr solution was repeated 7 to 9 times on PbBr<sub>2</sub>/mp-TiO<sub>2</sub>/c-TiO<sub>2</sub>/FTO until a strong signal at 11.6° of CsPb<sub>2</sub>Br<sub>5</sub> almost disappeared. The signal positions of FTO (= SnO<sub>2</sub>) and TiO<sub>2</sub> are indicated by □ and ○, respectively.

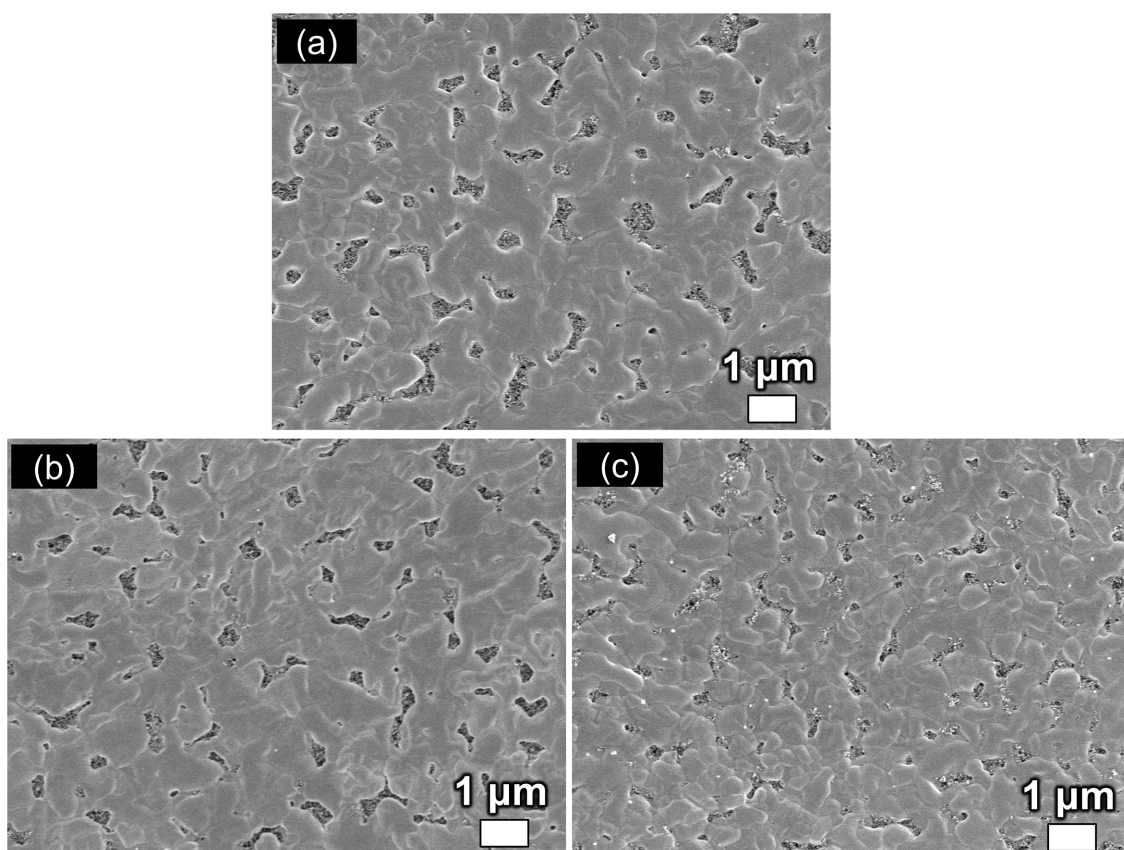

**Fig. S2** Top-view FE-SEM images of  $\text{PbBr}_2$  layers on  $\text{mp-TiO}_2/\text{c-TiO}_2/\text{FTO}$  using a  $\text{PbBr}_2$  solution of (a) 1.40, (b) 1.30 or (c) 1.20  $\text{mol L}^{-1}$ .

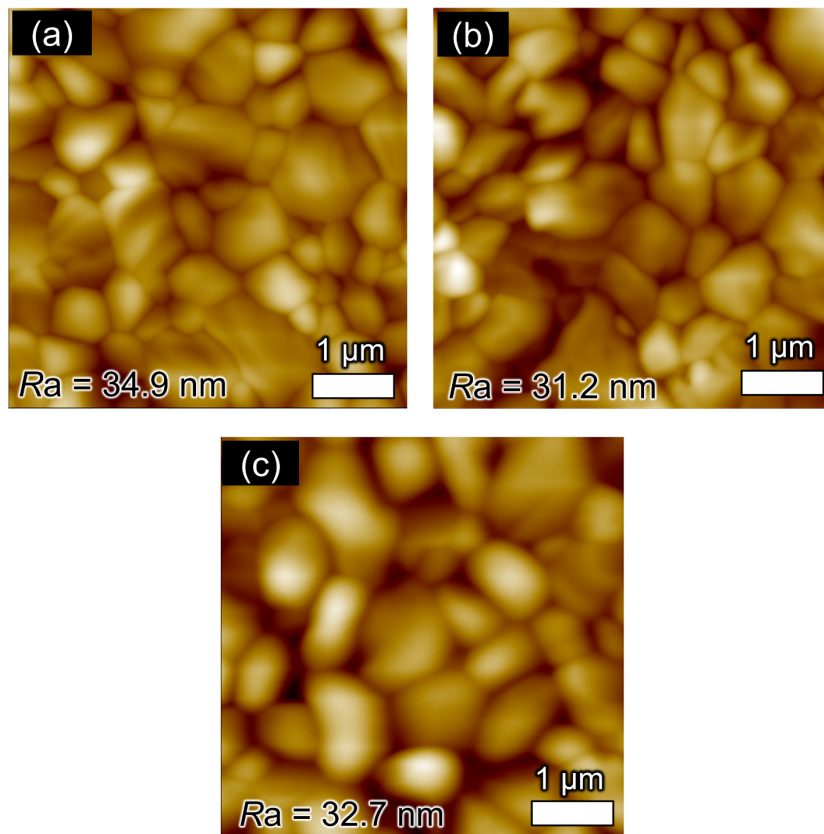

**Fig. S3** AFM images of CsPbBr<sub>3</sub> grains on FTO/c-TiO<sub>2</sub>/mp-TiO<sub>2</sub> using a PbBr<sub>2</sub> solution of (a) 1.20, (b) 1.30 or (c) 1.40 mol L<sup>-1</sup>. Ra values show average surface roughness.

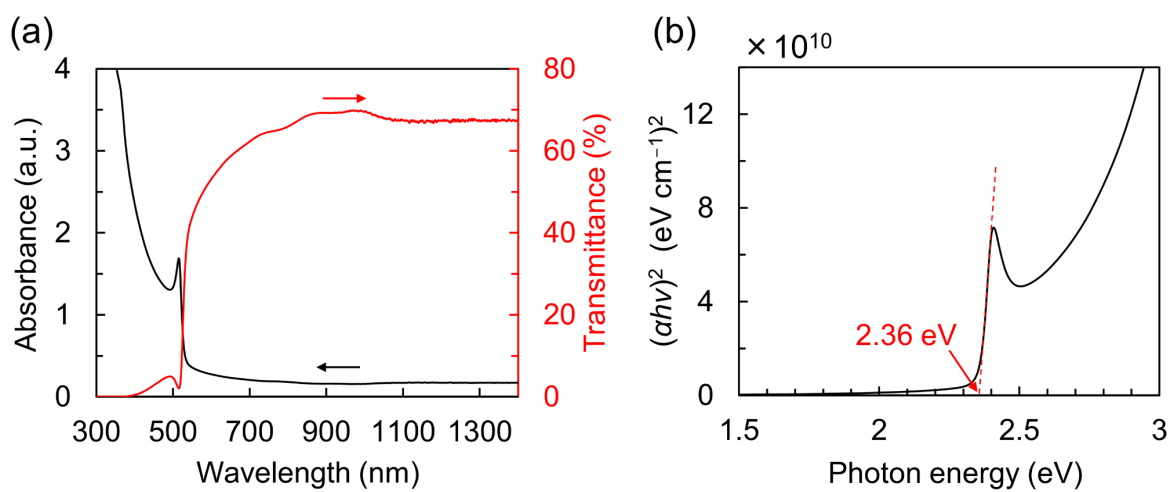

**Fig. S4** (a) UV-Vis-near IR absorption/transmittance spectrum of FTO/c-TiO<sub>2</sub>/mp-TiO<sub>2</sub>/CsPbBr<sub>3</sub> (1.40 mol L<sup>-1</sup>). A sharp absorption at 505 nm is characteristic of a direct-transition semiconductor. The bandgap energy ( $E_g$ ) is estimated as 2.36 eV based on a Tauc plot (b) transformed from (a).



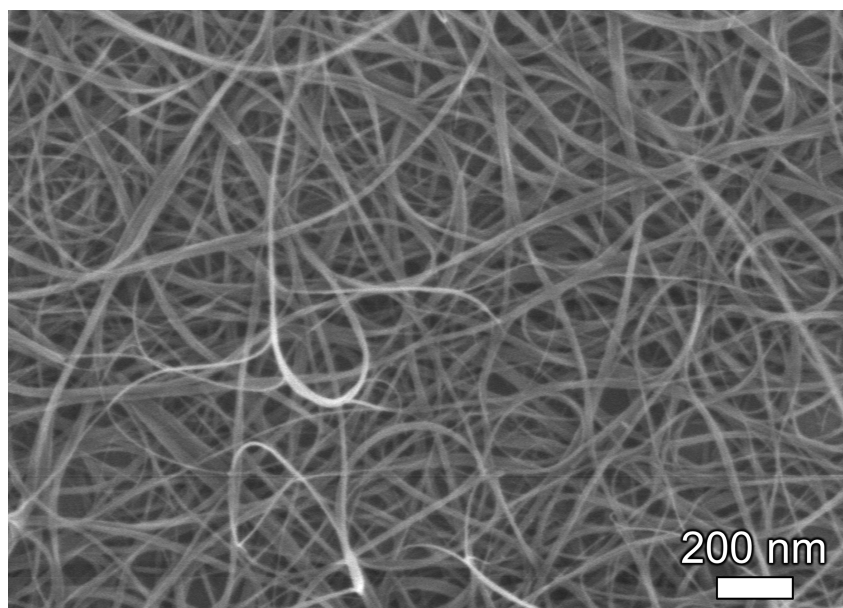

**Fig. S5** Top-view SEM image of a SWNT thin film (60%T) transferred onto a glass substrate. Commercial SWNTs with a nominal diameter of 1.5 nm form bundles with an average width between 6 and 60 nm.

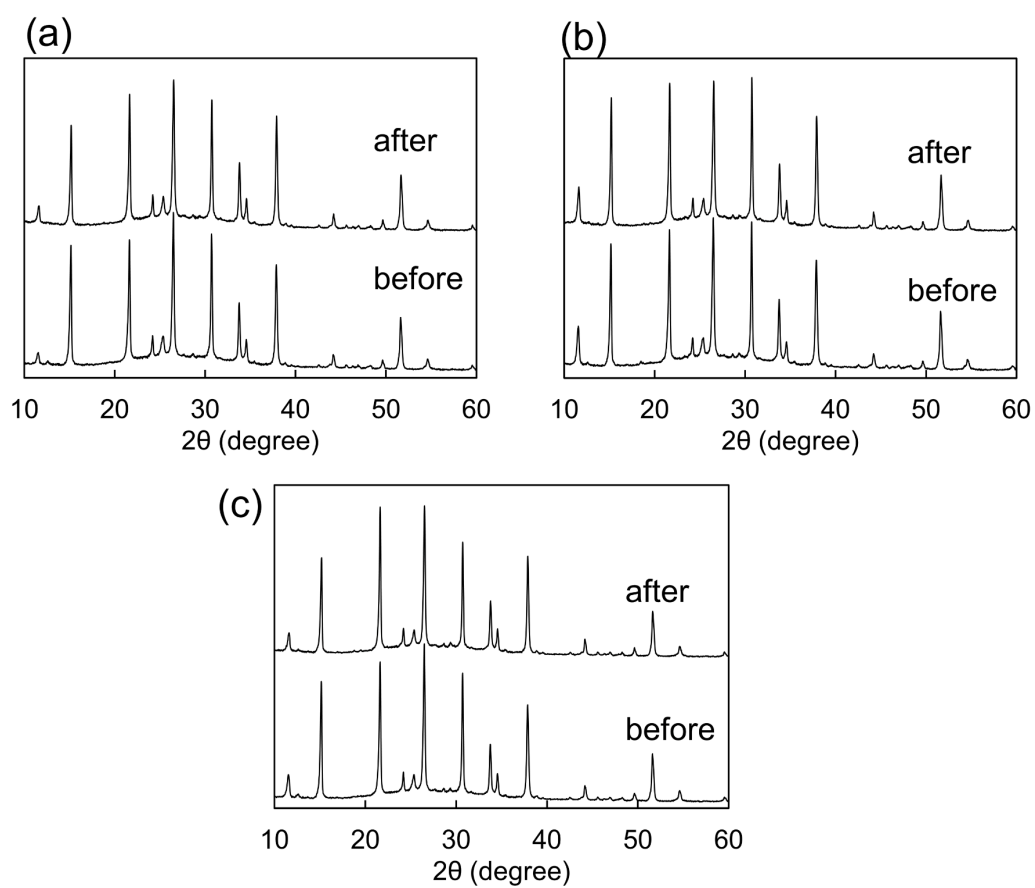

**Fig. S6** XRD patterns of s-PSCs before/after transferring the semitransparent SWNT thin film. The CsPbBr<sub>3</sub> layer was prepared using a PbBr<sub>2</sub> solution of (a) 1.20, (b) 1.30 or (c) 1.40 mol L<sup>-1</sup>.

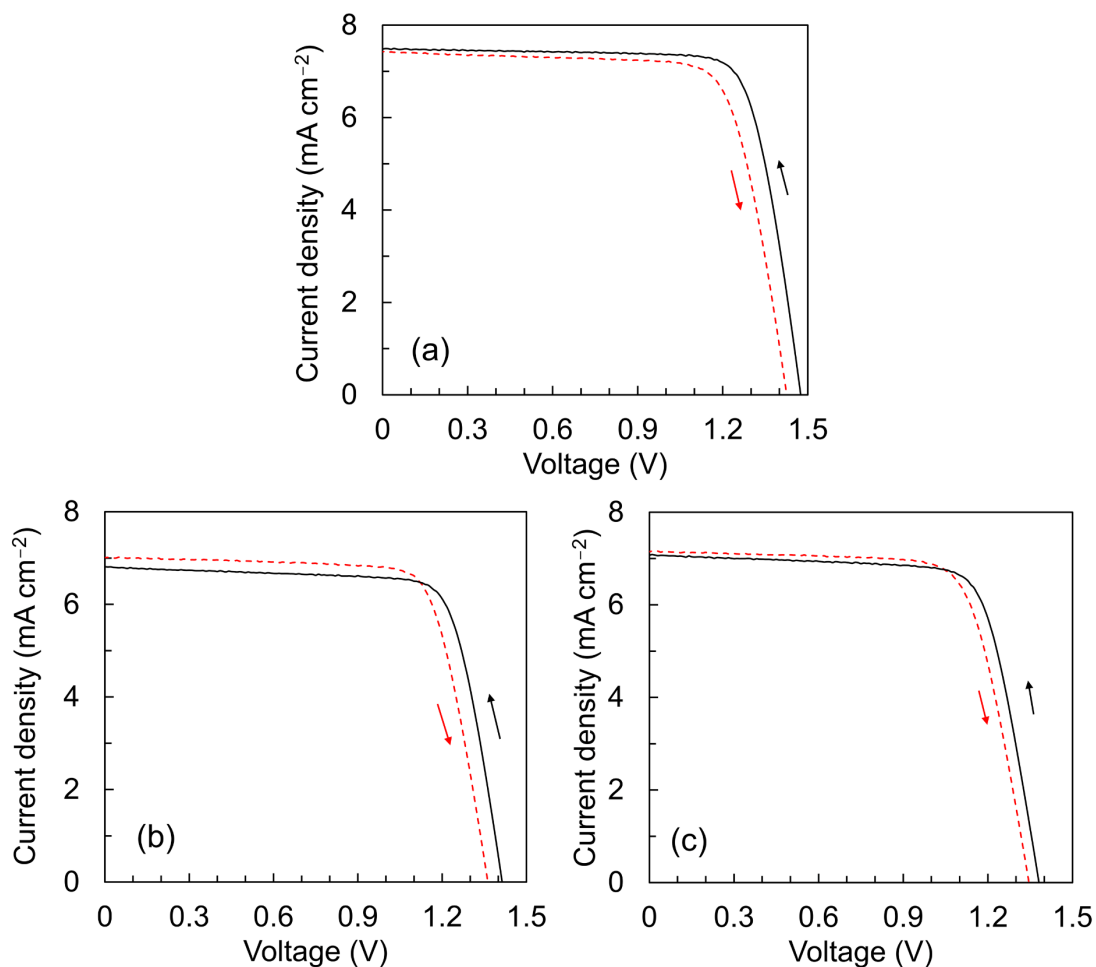

**Fig. S7** *J-V* curves of *s*-PSCs at 60%T under monofacial irradiation using pseudo sunlight ( $100 \text{ mW cm}^{-2}$ ) through FTO at an area of  $4.90 \times 10^{-2} \text{ cm}^2$ . The  $\text{CsPbBr}_3$  layer was prepared using a  $\text{PbBr}_2$  solution of (a) 1.40, (b) 1.30 or (c)  $1.20 \text{ mol L}^{-1}$ . Photovoltaic parameter values are summarized in the following table.

**Table** Photovoltaic parameter values based on Fig. S7

| Concentration of $\text{PbBr}_2$ solutions ( $\text{mol L}^{-1}$ ) | Scan direction | $J_{sc}$ ( $\text{mA}\cdot\text{cm}^{-2}$ ) | $V_{oc}$ (V) | FF   | PCE (%) | HI (%) |
|--------------------------------------------------------------------|----------------|---------------------------------------------|--------------|------|---------|--------|
| 1.2                                                                | forward        | 7.15                                        | 1.35         | 0.74 | 7.14    | 2.99   |
|                                                                    | reverse        | 7.08                                        | 1.38         | 0.75 | 7.36    |        |
| 1.3                                                                | forward        | 7.01                                        | 1.36         | 0.76 | 7.28    | 1.75   |
|                                                                    | reverse        | 6.81                                        | 1.41         | 0.77 | 7.41    |        |
| 1.4                                                                | forward        | 7.42                                        | 1.43         | 0.76 | 8.01    | 7.72   |
|                                                                    | reverse        | 7.49                                        | 1.48         | 0.79 | 8.68    |        |

HI values show the hysteresis index calculated as  $(\text{PCE}_{\text{reverse}} - \text{PCE}_{\text{forward}}) / \text{PCE}_{\text{reverse}} \times 100$  (%).

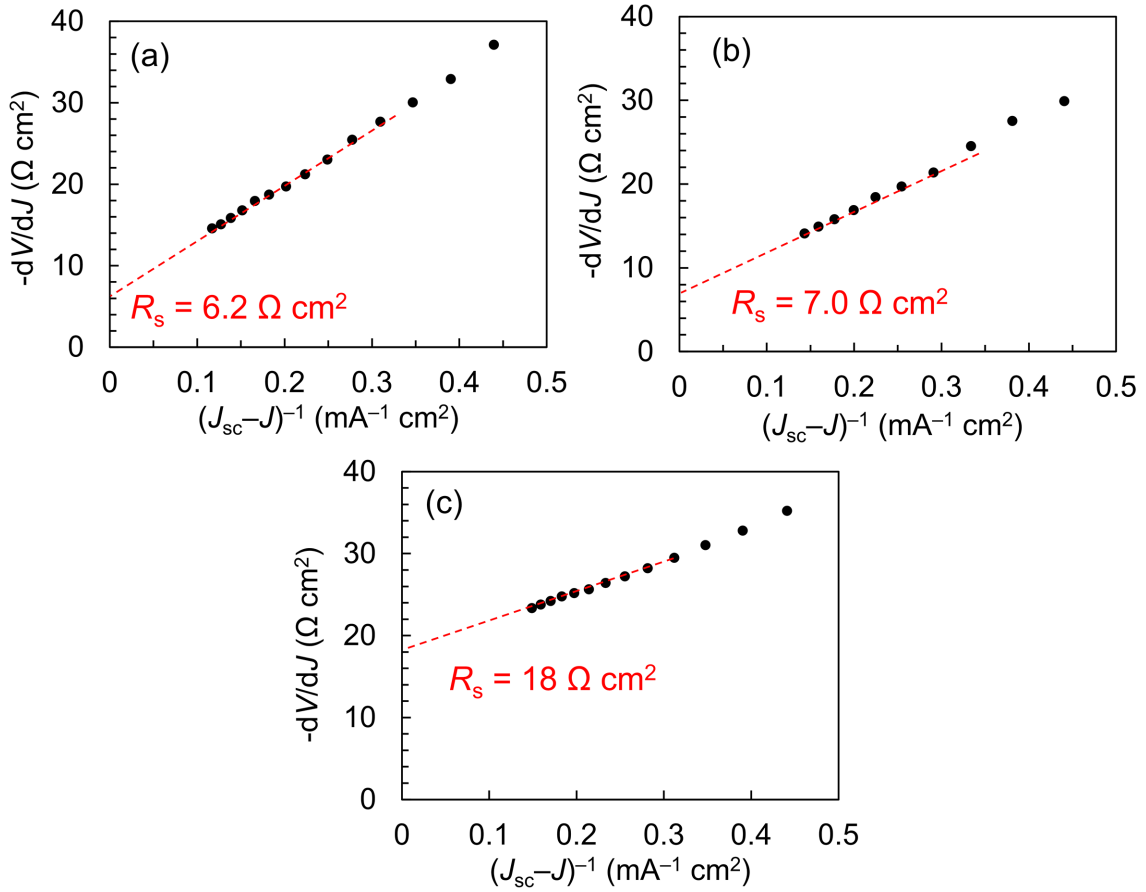

**Fig. S8.** Plots of  $-dV/dJ$  vs.  $(J_{sc} - J)^{-1}$  and the linear fitting for calculation of series resistance ( $R_s$ ) values. In a high-shunt-resistance ( $R_{sh}$ ) condition,  $R_s$  values are estimated based on the following equation,<sup>1,2</sup>

$$-\frac{dV}{dJ} = \frac{mK_B T}{e} (J_{sc} - J)^{-1} + R_s$$

where  $V$  is the bias voltage,  $J$  is the current density,  $m$  is the ideality factor of a heterojunction,  $K_B$  is the Boltzman constant,  $T$  is the absolute temperature,  $e$  is the elementary charge, and  $J_{sc}$  is the short-circuit current density.  $R_s$  values are calculated from the linear-fitting intercepts using plots of  $-dV/dJ$  vs.  $(J_{sc} - J)^{-1}$ .

#### References

1. J. Shi, J. Dong, S. Lv, Y. Xu, L. Zhu, J. Xiao, X. Xu, H. Wu, D. Li, Y. Luo and Q. Meng, Hole-conductor-free perovskite organic lead iodide heterojunction thin-film solar cells: High efficiency and junction property, *Appl. Phys. Lett.*, 2014, **104**, 063901.
2. S. S. Hegedus and W. N. Shafarman, Thin-film solar cells: device measurements and analysis, *Prog. Photovoltaics Res. Appl.*, 2004, **12**, 155–176.

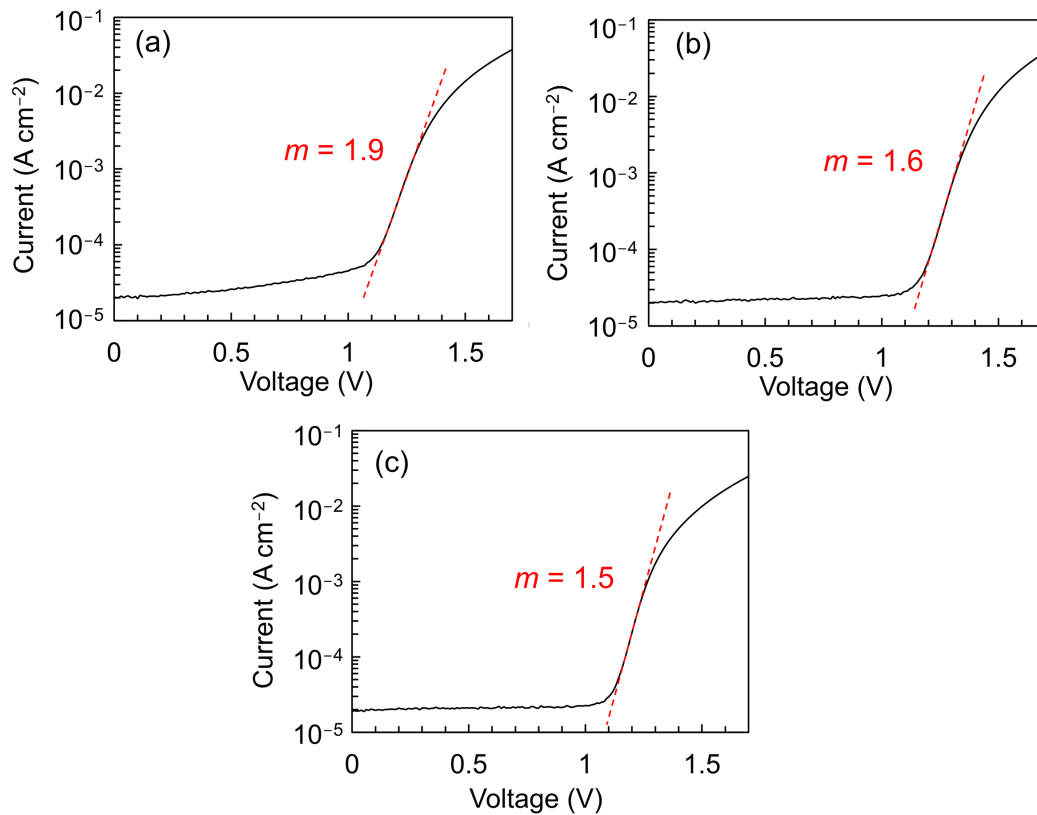

**Fig. S9**  $J$ - $V$  curves of s-PSCs at different transmittance values of (a) 60, (b) 70, and (c) 80%T in the dark. The  $J$ - $V$  curves are composed of recombination currents in the diode space-charge region, diffusion currents, and diode diffusion currents limited by series resistance. Based on linearities (red dotted lines) of the diffusion currents versus applied voltages, the diode ideal factor ( $m$ ) values were calculated between 1 and 2.

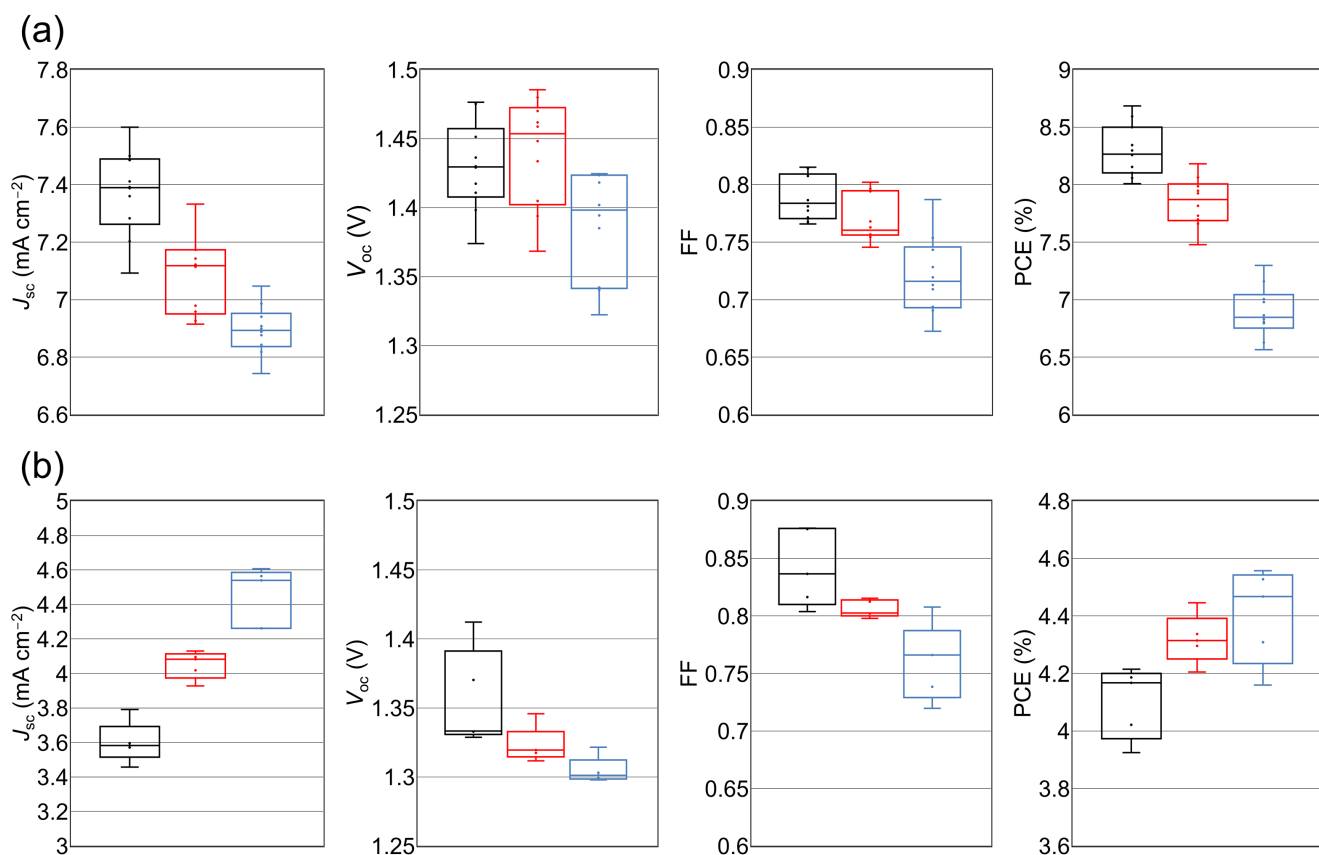

**Fig. S10** Statistical distributions of the photovoltaic parameter values of s-PSCs at different transmittance values of 60 (black), 70 (red), and 80%T (blue) via the monofacial irradiation through (a) FTO and (b) SWNT.

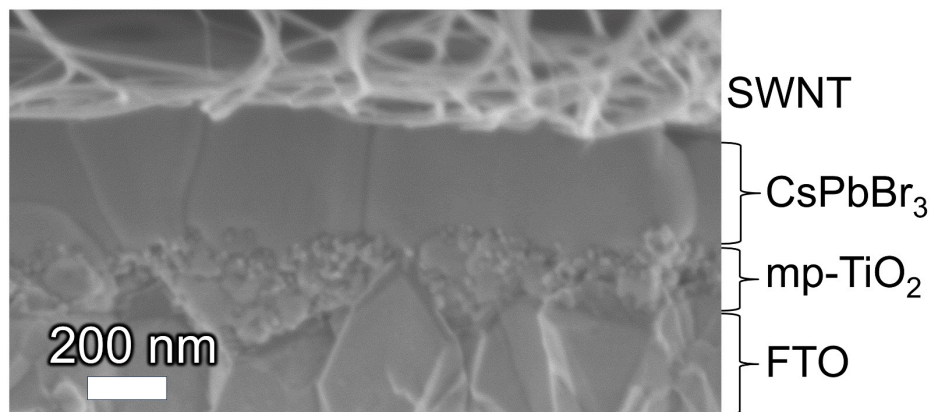

**Fig. S11** Cross-sectional FE-SEM image of an s-PSC at 60%T. The SWNT bundles cannot penetrate the narrow spaces between monolayer-aligned large grains.

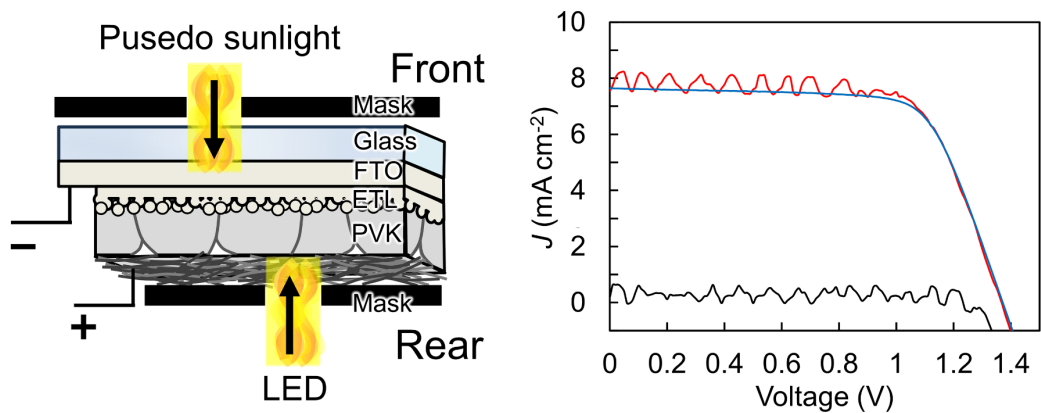

**Fig. S12** *J-V* curves of an s-PSC at 60%T under monofacial irradiation using an on/off mode of LED light through SWNT (black line) and using pseudo sunlight (AM 1.5G) through FTO (blue line) and under bifacial irradiation using the on/off LED light through SWNT and pseudo sunlight through FTO (red line). As shown in the schematic PSC, the apertures ( $4.90 \times 10^{-2} \text{ cm}^2$ ) for irradiation through the front (FTO) and rear (SWNT) electrodes are in different positions. The LED-light power ranges between 32% and 35% of the pseudo-sunlight power ( $100 \text{ mW cm}^{-2}$ ). The distance between the LED source and the PSC is adjusted to generate  $J_{sc}(\text{SWNT}) = 1.00 \text{ mA cm}^{-2}$  in the case of 60%T. The *J-V* curve profile (red line) is nearly identical to Fig. 5b irradiated through the front (FTO) and rear (SWNT) electrodes at the same position.



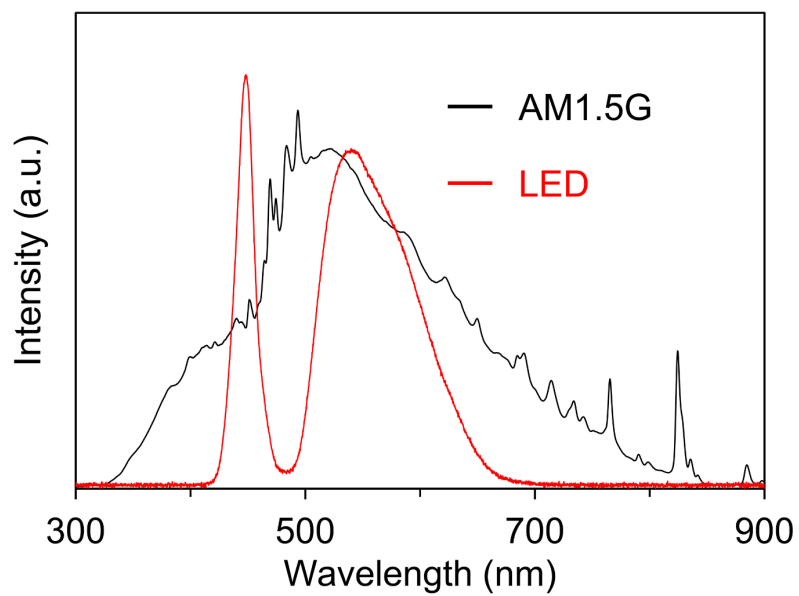

**Fig. S13** Emission spectrum of the LED compared to the pseudo sunlight (AM 1.5G).

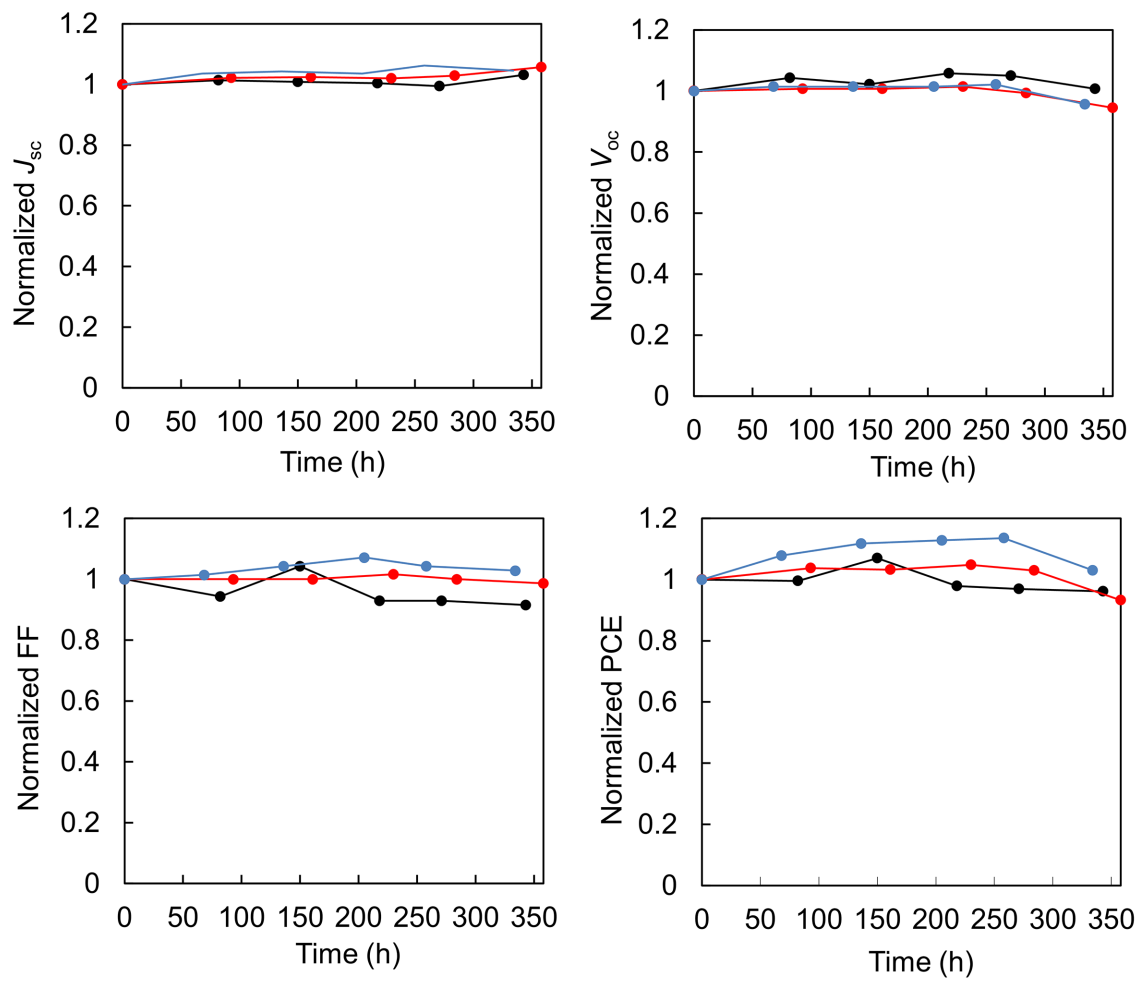

**Fig. S14** Stability experiment of an s-PSC at 60%T exposure to ambient air without sealing.

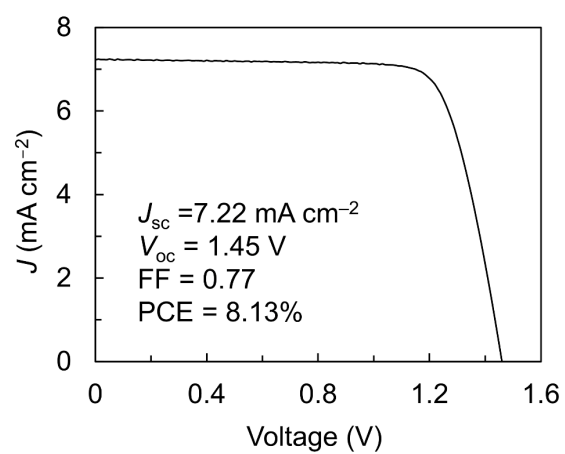

**Fig. S15** *J-V* curve of an s-PSC at 60%T under monofacial irradiation using pseudo sunlight through FTO. The irradiation area is expanded to  $1.56 \times 10^{-1}$  from  $4.90 \times 10^{-2} \text{ cm}^2$  of Fig. 4a.
